# Supplementary material
Source: PubMed Central journal article supplement (PMC3977034)
Supplement: NIHMS57781-supplement-ESM_Table_1.pdf [file NIHMS57781-supplement-ESM_Table_1.pdf]

**Electronic supplementary material****ESM Table 1** Detail of methodology and definitions of cardiovascular disease, cardiovascular risk factors and metabolic complications

| <b>Variable</b>         | <b>Definition</b>                                                                                                                                                                                                                                                                                                                                                                                                       |
|-------------------------|-------------------------------------------------------------------------------------------------------------------------------------------------------------------------------------------------------------------------------------------------------------------------------------------------------------------------------------------------------------------------------------------------------------------------|
| Hypertension            | Systolic and diastolic brachial blood pressures were measured in the right arm to the nearest 2 mmHg using a stethoscope and an aneroid sphygmomanometer (Acceson, AC Cossor & Son (Surgical), Harlow, UK)<br>Blood pressure >130/85 mmHg and/or the use of antihypertensive therapy                                                                                                                                    |
| Obesity measures        | BMI was calculated using measurements of standing height and weight<br>Waist and hip circumferences were measured to the nearest 0.1cm<br>Body fat percentage was taken as the average of three consecutive readings (to the nearest 0.1%), using an OMRON BF306 Body Fat Monitor (OMRON Healthcare [UK], Henfield, UK)                                                                                                 |
| Dyslipidaemia           | HDL-cholesterol lower than 1.0 mmol/l and/or the use of lipid-lowering therapy                                                                                                                                                                                                                                                                                                                                          |
| Myocardial infarction   | Two out of the first three of the following criteria were met, or if both the first and last criteria were met:<br>(1) self-report of heart attack<br>(2) myocardial infarction indicated by WHO Chest Pain Questionnaire [1]<br>(3) ECG evidence of ischaemia<br>(4) prior hospital discharge code for myocardial infarction (ICD-10 codes <sup>a</sup> I21–I23, I252)                                                 |
| Angina                  | Two out of the first three of the following criteria were met, or if both the first and last criteria were met:<br>(1) self-report of doctor-diagnosed angina or taking regular anti-anginal medication<br>(2) angina indicated on WHO Chest Pain Questionnaire<br>(3) ischaemic ECG code<br>(4) prior hospital discharge code for ischaemic heart disease (ICD-10 codes <sup>a</sup> I20–25)                           |
| Ischaemic heart disease | History of either myocardial infarction or angina                                                                                                                                                                                                                                                                                                                                                                       |
| Stroke                  | Two out of three of the following criteria were met:<br>(1) participant recall of a doctor's diagnosis of stroke<br>(2) prior hospital discharge code consistent with stroke (ICD-10 codes <sup>a</sup> I61, I63–I66, I679, I694)<br>(3) confirmation by clinical notes review that event not due to transient ischaemic attack (TIA)                                                                                   |
| TIA                     | Two out of three of the following criteria were met:<br>(1) participant recall of a doctor's diagnosis of stroke<br>(2) prior hospital discharge code consistent with TIA (ICD-10 codes <sup>a</sup> G45 and G659)<br>(3) confirmation by clinical notes review that event due to TIA<br>TIA was also recorded if participants self-reported a history of 'TIA', 'mini-stroke' or 'slight stroke'                       |
| Cerebrovascular disease | History of either stroke or TIA                                                                                                                                                                                                                                                                                                                                                                                         |
| Neuropathy              | Neuropathy was evaluated with hand-held neurothesiometer readings taken from the apex of the great toe (Horwell Neurothesiometer, Scientific Laboratory Supplies, Nottingham, UK)<br>Neurothesiometer threshold higher than 15 V<br>This vibration perception threshold has been previously used in the literature to define moderate to high neuropathy [2]                                                            |
| Retinopathy             | Standard 7 field digital retinal colour photographs of both eyes were taken at 30° by a single specially trained medical photographer, following pupillary dilatation and using a high resolution digital retinal camera (TOPCON TRC-50FX). Graded as present (mild, moderate or severe) or absent based on a modification of the system described by the Early Treatment Diabetic Retinopathy Study Research Group [3] |
| ACR                     | Calculated by dividing the urinary albumin concentration (mg) by the urinary creatinine concentration (mmol)                                                                                                                                                                                                                                                                                                            |
| ABPI                    | Right and left brachial, posterior tibial and dorsalis pedis systolic pressures were recorded using an aneroid sphygmomanometer and a Doppler probe (Dopplex Advanced Pocket Doppler, Huntleigh Healthcare, Cardiff, UK) and the ABPI calculated by dividing the lowest of the ankle pressures by the higher of the two arm pressures                                                                                   |

<sup>a</sup>[www.who.int/classifications/icd/en/](http://www.who.int/classifications/icd/en/)

## References

1. Rose G, McCartney P, Reid DD (1977) Self-administration of a questionnaire on chest pain and intermittent claudication. *Br J Prev Soc Med* 31:42–48
2. Young MJ, Breddy JL, Veves A, Boulton AJ (1994) The prediction of diabetic neuropathic foot ulceration using vibration perception thresholds. A prospective study. *Diabetes Care* 17:557–560
3. Anonymous (1991) Grading diabetic retinopathy from stereoscopic color fundus photographs—an extension of the modified Airlie House classification. ETDRS report number 10. Early Treatment Diabetic Retinopathy Study Research Group. *Ophthalmology* 98:786–806
